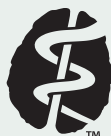

# The American Journal of Psychiatry

Official Journal of the American Psychiatric Association

## Officers 2016–2017

### President

Maria A. Oquendo, M.D., Ph.D.

### President-Elect

Anita S. Everett, M.D.

### Treasurer

Bruce J. Schwartz, M.D.

### Secretary

Altha J. Stewart, M.D.

### Assembly

#### Speaker

Daniel J. Anzia, M.D.

#### Speaker-Elect

Theresa M. Miskimen, M.D.

#### Recorder

James R. Batterson, M.D.

### Office of the CEO and Medical Director

#### CEO and Medical Director

Saul Levin, M.D., M.P.A.

### Board of Trustees

Uchenna Achebe, M.D., M.P.H.

Jeffrey Akaka, M.D.

Lama Bazzi, M.D.

R. Scott Benson, M.D.

Renée L. Binder, M.D.

Ronald M. Burd, M.D.

Stella Cai, M.D.

Jeffrey L. Geller, M.D., M.P.H.

Jeffrey A. Lieberman, M.D.

Roger Peele, M.D.

Vivian B. Pender, M.D.

Gail E. Robinson, M.D.

Paul Summergrad, M.D.

Richard F. Summers, M.D.

Melinda Young, M.D.

## Editorial Board

### Editor

Robert Freedman, M.D.

### Deputy Editors

David A. Lewis, M.D.

Robert Michels, M.D.

Daniel S. Pine, M.D.

A. John Rush, M.D.

Susan K. Schultz, M.D.

Carol A. Tamminga, M.D.

### Associate Editors

Alan Brown, M.D., M.P.H.

Tyrone Cannon, Ph.D.

Benjamin G. Druss, M.D., M.P.H.

Felton Earls, M.D.

Graham J. Emslie, M.D.

Daniel C. Javitt, M.D.

Bankole Johnson, M.D.

Joan L. Luby, M.D.

Constantine G. Lyketsos, M.D., M.H.S.

Helen S. Mayberg, M.D., F.R.C.P.C.

Terrie E. Moffitt, Ph.D.

Roy Perlis, M.D.

Anita Thapar, M.B.B.Ch., F.R.C.Psych.,

Ph.D., F.Med.Sci.

Mauricio Tohen, M.D., Dr.PH., M.B.A.

Eduard Vieta, M.D., Ph.D.

Katherine L. Wisner, M.D., M.S.

Xin Yu, M.D.

### Editor Emerita

Nancy C. Andreasen, M.D., Ph.D.

### Former Editors

Amariah Brigham, M.D., 1844–1849

T. Romeyn Beck, M.D., 1849–1854

John P. Gray, M.D., 1854–1886

G. Alder Blumer, M.D., 1886–1894

Richard Dewey, M.D., 1894–1897

Henry M. Hurd, M.D., 1897–1904

Edward N. Brush, M.D., 1904–1931

Clarence B. Farrar, M.D., 1931–1965

Francis J. Braceland, M.D., 1965–1978

John C. Nemiah, M.D., 1978–1993

### Editorial Staff

#### Executive Editor

Michael D. Roy

#### Senior Editors

John J. Guardiano, Ph.D.

Jane Weaver

#### Production Manager

Susan Westrate

#### Assistant Editor

Angela Moore

#### Online Content Manager

Michael Pogachar

#### Editorial Support Services Manager

Heidi Koch

#### Editorial Assistant

Linda LaCour

#### Assistants to the Editors

Lois Lilienthal

Laura English

Rachel Hogg

Russell A. Scholl

### Publisher

Rebecca D. Rinehart

# The Residents' JOURNAL

## The American Journal of Psychiatry Residents' Journal

November 2016

Volume 11

Issue 11

### Inside

- 2 Catatonia and Delirium: A Challenge in General Hospital Psychiatry**  
Kamalika Roy, M.D.  
*Emphasis on how indistinct nosology can lead to use of ineffective treatment.*
- 3 Improving Communication Between Patients and Providers Surrounding the Legal Basis for Admission**  
Robert Loman, M.D.  
*Examining individual plan of service.*
- 6 Hypokalemia and Psychosis: A Forgotten Association**  
Ella Hong, M.D.  
*Focusing on the management of serum potassium levels.*
- 8 A Complex Case of Suspected Serotonin Syndrome**  
Anna Kim, M.D.  
*Analysis of clinical presentation, treatment, and restarting psychiatric medications.*
- 11 Revisiting Decision-Making Capacity**  
Aparna Atturu, M.D.  
*Investigating the specific role of psychiatrists.*
- 13 ANNA-1 Paraneoplastic Encephalomyelitis Presenting as Rapidly Progressing Dementia in a Man With Undiagnosed Small Cell Lung Cancer**  
Patrick K. Reville, M.P.H., Catherine Steingraeber, M.D.  
*Discussion of the utility of PET imaging in diagnosis.*
- 16 Monitoring the Meeting: Opioids and Cannabis: Myths and Misperceptions**  
Rasna Patel, M.D., Amit Mistry, M.D.  
*Synopsis of one session held at the 2016 APA Annual Meeting in Atlanta.*
- 17 Twilight, Chickens, and a Return to Humanity: A Letter to the Interns**  
Linda B. Drozdowicz, M.D.  
*A third-year resident's advice to first-year interns.*

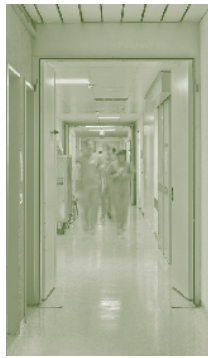

© Shutterstock.com

ACPA  
**physician**  
PUBLICATION

**FIND THE RIGHT  
CAREER FOR YOU!**

General/Adult | Addiction | Geriatric  
Child/Adolescent | Medical Director  
Primary Care

**EDITOR-IN-CHIEF**  
Katherine Pier, M.D.  
**SENIOR DEPUTY EDITOR**  
Rachel Katz, M.D.  
**DEPUTY EDITOR**  
Oliver Glass, M.D.

**GUEST EDITOR**  
Kamalika Roy, M.D.  
**ASSOCIATE EDITORS**  
Gopalkumar Rakesh, M.D.  
Janet Charoensook, M.D.

**MEDIA EDITOR**  
Michelle Liu, M.D.  
**CULTURE EDITOR**  
Aparna Atturu, M.D.  
**STAFF EDITOR**  
Angela Moore

**EDITORS EMERITI**  
Rajiv Radhakrishnan, M.B.B.S., M.D.  
Misty Richards, M.D., M.S.

Arshya Vahabzadeh, M.D.  
Monifa Seawell, M.D.  
Sarah M. Fayad, M.D.

Joseph M. Cerimele, M.D.  
Molly McVoy, M.D.  
Sarah B. Johnson, M.D.

**Editor-in-Chief**  
Katherine Pier, M.D.  
**Senior Deputy Editor**  
Rachel Katz, M.D.  
**Deputy Editor**  
Oliver Glass, M.D.  
**Associate Editors**  
Gopalkumar Rakesh, M.D.  
Janet Charoensook, M.D.

*The Residents' Journal*, the largest and most robust resident-led journal in the house of medicine, is an e-publication that serves as a forum to share your ideas and experiences in training, clinical practice, research, and careers with your colleagues.

To submit a manuscript, please visit [mc.manuscriptcentral.com/appi-ajp](http://mc.manuscriptcentral.com/appi-ajp) and select a manuscript type for AJP Residents' Journal. You may submit a commentary (500 words), book review (500 words), history of psychiatry (500 words), clinical case conference (1,250 words), review article (1,500 words), treatment in psychiatry article (1,500 words), research article (1,250 words), drug review (1,500 words), or letter to the editor (250 words).

*The Residents' Journal* is sent free-of-charge to all psychiatry residents. Anyone interested in being included on the distribution list should contact Angela Moore, *The Residents' Journal* staff editor at [ajp@psych.org](mailto:ajp@psych.org) with "Subscribe to Residents' Journal" in the subject line.

To access the complete Residents' Journal archives, visit [ajp.psychiatryonline.org/residents\\_journal](http://ajp.psychiatryonline.org/residents_journal)

# THE AMERICAN PSYCHIATRIC ASSOCIATION

1000 Wilson Blvd., Suite 1825, Arlington, VA 22209-3901  
(888) 357-7924 (toll-free inside the U.S. and Canada) / (703) 907-7300  
web site: [www.psychiatry.org](http://www.psychiatry.org) • e-mail: [apa@psych.org](mailto:apa@psych.org)

## Chairpersons of Councils, Committees, and Task Forces

### Standing Committees

|                             |                          |
|-----------------------------|--------------------------|
| <b>Bylaws</b>               | Edythe Harvey, M.D.      |
| <b>Elections</b>            | Barry K. Herman, M.D.    |
| <b>Ethics</b>               | Ezra Griffith, M.D.      |
| <b>Finance and Budget</b>   | Alan F. Schatzberg, M.D. |
| <i>Audit</i>                | Bruce J. Schwartz, M.D.  |
| <i>Investment Oversight</i> | David Fassler, M.D.      |
| <b>Joint Reference</b>      | Anita S. Everett, M.D.   |
| <b>Membership</b>           | Rahn K. Bailey, M.D.     |
| <b>Nominating</b>           | Renee Binder, M.D.       |
| <b>Tellers</b>              | Jose Vito, M.D.          |

### Councils

#### **Council on Addiction Psychiatry**

Frances R. Levin, M.D.

#### **Council on Advocacy and Government Relations**

Debra Pinals, M.D.

*Advocacy and Litigation Funding*

Jeffrey Akaka, M.D.

#### **Council on Children, Adolescents, and Their Families**

Joseph V. Penn, M.D.

#### **Council on Communications**

Christopher Ramsey, M.D.

#### **Council on Geriatric Psychiatry**

Robert P. Roca, M.D.

#### **Council on Healthcare Systems and Financing**

Harsh K. Trivedi, M.D.

*Reimbursement for Psychiatric Care*

Laurence Miller, M.D.

*RBRVS, Codes and Reimbursement*

Gregory G. Harris, M.D.

*Telepsychiatry*

James H. Shore, M.D.

#### **Council on International Psychiatry**

Bernardo Ng, M.D.

#### **Council on Medical Education and Lifelong Learning**

Mark H. Rapaport, M.D.

*Scientific Program*

Philip Muskin, M.D.

*Vestermark Award Committee*

Jonathan F. Borus, M.D.

#### **Council on Minority Mental Health and Health Disparities**

Christina V. Mangurian, M.D.

#### **Council on Psychiatry and Law**

Steven K. Hoge, M.D.

*Judicial Action*

Marvin S. Swartz, M.D.

#### **Council on Psychosomatic Medicine (Consultation Liaison Psychiatry)**

David F. Gitlin, M.D.

#### **Council on Quality Care**

Grayson Norquist, M.D.

*Mental Health Information Technology*

Steven Daviss, M.D.

*Performance Measures*

Karen Pierce, M.D.

*Steering Committee on Practice Guidelines*

Michael J. Vergare, M.D.

#### **Council on Research**

Dwight L. Evans, M.D.

*Psychiatric Dimensions of Disasters*

Robert J. Ursano, M.D.

# Go Online

Visit [ajp.psychiatryonline.org](http://ajp.psychiatryonline.org) for these features!

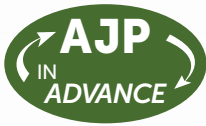

## AJP in Advance

*Discover the latest research advances before they appear in print*

### **Increased Activity or Energy as a Primary Criterion for the Diagnosis of Bipolar Mania in DSM-5: Findings From the STEP-BD Study**

Adding increased activity to criterion A for DSM-5 bipolar disorder reduced the prevalence of mania and hypomania and appeared to increase the prevalence of depression with mixed features. The new criterion did not affect global or functional ratings at 1-year follow-up.

### **Neurometabolic Disorders: Potentially Treatable Abnormalities in Patients With Treatment-Refractory Depression and Suicidal Behavior**

CSF metabolite abnormalities were identified in 21 of 33 patients with treatment-refractory depression. Cerebral folate deficiency was found in 12 patients, and treatment with folinic acid led to a significant decrease in mean depression score.

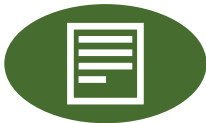

## AJP CME

*Earn CME credit: 3 courses per issue*

This month's courses appear on pages 1253–1256. Each short course is based on one article in this issue and can earn up to 1 *AMA PRA Category 1 Credit™*. CME credit is issued only **online**, and a paid subscription to AJP's CME course program is required.

Visit [psychiatryonline.org/cme](http://psychiatryonline.org/cme) and click on the "American Journal of Psychiatry" tab.

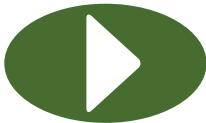

## AJP Multimedia

*Access Audio or Video for highlights of each issue*

In AJP Audio this month, Deputy Editor Susan K. Schultz, M.D., discusses combat attachment behaviors in former service members with PTSD, postpartum psychosis, the association between pain and opioid use disorder, work productivity in relation to depression outcome, neural response to rewards as a predictor of depression, and adjustment disorder following trauma exposure.

In this month's video, Deputy Editor Daniel S. Pine, M.D., discusses whether prescription opioid use disorder is associated with disabling pain after three years and the prevalence of adjustment disorder 12 months after severe injury.

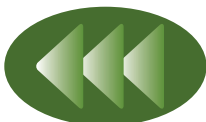

## History of Psychiatry

*Revisit the field's rich history through the pages of AJP*

### **50 years ago this month: "Changes in a Population of Hospitalized Patients With Affective Disorders, 1945–1965"**

Among the notable findings in Dr. Saul H. Rosenthal's discharge-record study were that, within the category of affective disorders, patients were younger on average, and "admissions of patients with diagnoses of involuntional psychotic reaction and manic-depressive reaction decreased ... and were replaced by a large number of patients diagnosed as depressive reactions." He suggests a variety of possible reasons for the changes and emphasizes that they "may parallel the redefinition of mental illness and the greater acceptance of psychiatric hospitalization" between 1945 and 1965.
