DECEMBER 2016 | VOLUME 173 | NUMBER 12

# The American Journal of Psychiatry

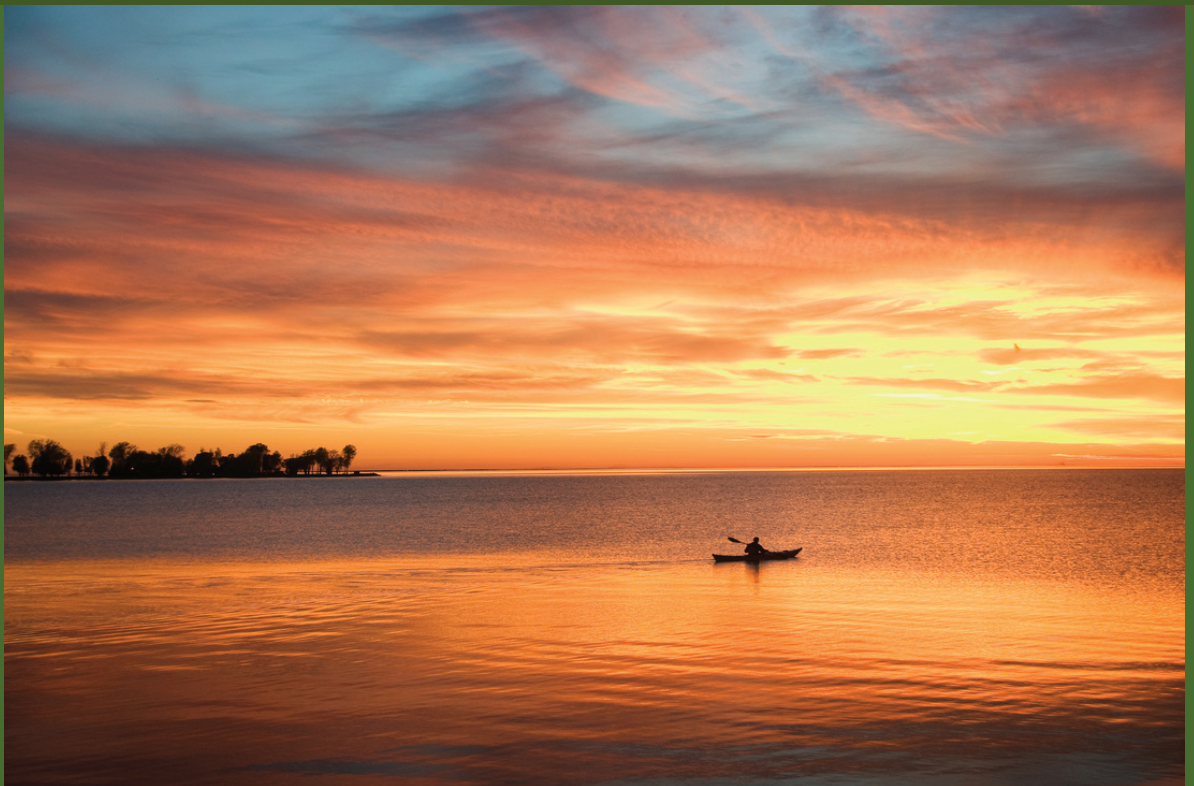

Postdeployment PTSD and Addictive Combat Attachment  
Behaviors in U.S. Military Service Members

Postpartum Psychosis: Madness, Mania,  
and Melancholia in Motherhood

Pain as a Predictor of Opioid Use Disorder  
in a Nationally Representative Sample

Blunted Neural Response to Rewards as a Prospective Predictor  
of the Development of Depression in Adolescent Girls

AMERICAN  
PSYCHIATRIC  
ASSOCIATION

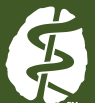

[ajp.psychiatryonline.org](http://ajp.psychiatryonline.org)
