## PERSPECTIVAS

### EDITORIALES

- 1161** Haciendo inferencias causales a partir de bases de datos observacionales  
*T. Michael Kashner, Ph.D., J.D.*
- 1163** Respuestas electrocorticales a las recompensas y estímulos emocionales como biomarcadores de riesgo de trastornos depresivos  
*Gerard E. Bruder, Ph.D.*
- 1165** Adaptándose a la investigación en estrés traumático  
*Murray B. Stein, M.D., M.P.H.*
- 1167** 2016 en perspectiva  
*[The Editors]*

### CONFERENCIA DE CASO CLÍNICO

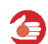

- 1171** TEPT posterior al despliegue y comportamiento adictivo de apego al combate en los miembros del servicio militar en los Estados Unidos  
*Marjorie S. Campbell, Ph.D., et al.* EMC • AUDIO • GUÍAS CLÍNICAS

### PERSPECTIVAS EN SALUD MENTAL GLOBAL

- 1177** Tratamiento del trastorno del ánimo post-parto en Irán  
*Mehran Zarghami, M.D., et al.*

### RESÚMENES Y RESEÑAS

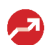

- 1179** Psicosis postparto: Locura, manía y melancolía en la maternidad  
*Veerle Bergink, M.D., Ph.D., et al.* EMC • AUDIO • GUÍAS CLÍNICAS

## NUEVAS INVESTIGACIONES

### ARTÍCULOS

- 1189** El dolor como predictor del trastorno por consumo de opiáceos en una muestra nacionalmente representativa  
*Carlos Blanco, M.D., Ph.D., et al.* EDITORIAL • EMC • AUDIO • VIDEO • GUÍAS CLÍNICAS
- 1196** La mejoría temprana de la productividad laboral predice el curso clínico futuro en pacientes ambulatorios deprimidos: Hallazgos del ensayo CO-MED  
*Manish K. Jha, M.B.B.S., et al.* AUDIO • GUÍAS CLÍNICAS
- 1205** Eficacia de la monoterapia con quetiapina en el trastorno por estrés postraumático: Un ensayo aleatorizado, controlado con placebo  
*Gerardo Villarreal, M.D., et al.* EDITORIAL • GUÍAS CLÍNICAS
- 1213** Un estudio de imágenes con tensor de difusión en niños con TDAH, trastorno del espectro autista, TOC, y controles de comparación: Perturbación claramente definida e indefinida de la sustancia blanca y relaciones dimensionales entre cerebro y comportamiento  
*Stephanie H. Ameis, M.D., M.Sc., et al.*
- 1223** Respuesta neural atenuada a las recompensas como un predictor prospectivo del desarrollo de la depresión en niñas adolescentes  
*Brady D. Nelson, Ph.D., et al.* EDITORIAL • AUDIO
- 1231** Un estudio longitudinal del trastorno de adaptación después de la exposición al trauma  
*Meaghan L. O'Donnell, Ph.D., et al.* EDITORIAL • AUDIO • VIDEO • GUÍAS CLÍNICAS

CARTAS AL EDITOR

- 1239 Efecto de un modulador receptor NMDA nuevo, Rapastinel (anteriormente GLYX-13), en TOC: Prueba de concepto**  
*Carolyn I. Rodriguez, M.D., Ph.D., et al.*
- 1241 La D-cicloserina, un agonista parcial del sitio de glicina de los receptores de glutamato NMDA, induce aumentos agudos de glutamato cerebral más glutamina y GABA comparable a la ketamina**  
*Joshua T. Kantrowitz, M.D., et al.*
- 1242 Pregabalina en el síndrome de Tourette: Una serie de casos**  
*Marius Hienert, M.D., M.Sc., et al.*
- 1243 Reflexiones de un médico de atención primaria y psiquiatra sobre el marco para extender los roles de los psiquiatras en el tratamiento de enfermedades generales**  
*Paul Rosen, M.D.*
- 1244 Utilizando la formación médica para psiquiatras para extender el acceso a la atención**  
*Melissa R. Arbuckle, M.D., Ph.D.*
- 1244 En apoyo de una convocatoria para mejorar la formación médica general de los psiquiatras: Respuesta a Rosen y Arbuckle**  
*Erik R. Vanderlip, M.D., M.P.H., et al.*

RESEÑAS BIBLIOGRÁFICAS

- 1246 A Doctor's Prescription for Health Care Reform: The National Medical Association Tackles Disparities, Stigma, and the Status Quo [La receta de un doctor para la reforma de la atención en salud: La asociación médica nacional aborda las desigualdades, el estigma y el status quo]**  
*Felton Earls, M.D.*
- 1247 DSM-5® Pocket Guide for Child and Adolescent Mental Health [Guía de bolsillo del DSM-5® para la salud mental de niños y adolescentes]**  
*Tami Benton, M.D.*

OTROS TEMAS DE INTERÉS

- 1248 Agradecimiento a los revisores**
- 1252 [Corrections]**
- 1253 Educación Médica Continuada**

**Cubierta:** [Lone kayaker on the waters off Egg Harbor in Door County, Wisconsin. Photo courtesy of Carlyle H. Chan, M.D., Professor of Psychiatry and the Institute for Health and Society (Bioethics and Medical Humanities), Medical College of Wisconsin, Milwaukee.]

Article content that addresses **Core Competencies**, defined by the Accreditation Council of Graduate Medical Education and the American Board of Medical Specialties, is indicated by the following symbols:

-  Professionalism
-  Patient Care and Procedural Skills
-  Medical Knowledge
-  Practice-Based Learning and Improvement
-  Interpersonal and Communication Skills
-  Systems-Based Practice.

More information is available at [www.abms.org/maintenance\\_of\\_certification/MOC\\_competencies.aspx](http://www.abms.org/maintenance_of_certification/MOC_competencies.aspx)

**AUDIO** Highlighted in AJP Audio, a downloadable .mp3 file available at [ajp.psychiatryonline.org](http://ajp.psychiatryonline.org)

**EMC** A course covering the content of this article is available online for paid subscribers to the AJP CME Course program

**EDITORIAL** Discussed in one of the issue's editorials

**GUÍAS CLÍNICAS** Clinical Guidance provided on the English table of contents

**VIDEO** Highlighted online by Deputy Editor Daniel S. Pine, M.D.

**La Tabla de Contenidos y resúmenes de Este Número Está Disponible en Español**

*(This issue's Table of Contents and abstracts are available in Spanish)*

Translation presented in collaboration with the Office of Global Health, Rutgers-Robert Wood Johnson Medical School

Support for this effort provided by ACTA Colombia.

**Translation courtesy of**

**Sergi Casals, M.A.**, Garuna, Medellín, Colombia ([www.garunaeditors.com](http://www.garunaeditors.com))

**Carlos Lopez Jaramillo, M.D.**, Universidad de Antioquia, Medellín, Colombia

**Javier I. Escobar, M.D., M.Sc.**, Rutgers-Robert Wood Johnson Medical School

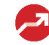

## Psicosis postparto: Locura, manía y melancolía en la maternidad

Veerle Bergink, M.D., Ph.D., Natalie Rasgon, M.D., Ph.D., Katherine L. Wisner, M.D., M.S.

**Objetivo:** La psicosis o la manía después del parto es una emergencia psiquiátrica con riesgo de suicidio e infanticidio.

**Método:** Los autores revisaron la investigación epidemiológica y genética y los detonantes fisiológicos en el postparto (endocrinos, inmunológicos, circadianos) de la psicosis. También resumieron todas las revisiones sistemáticas y sintetizaron los escasos estudios clínicos existentes para ofrecer recomendaciones diagnósticas, opciones de tratamiento y estrategias de prevención.

**Resultados:** La incidencia del inicio de psicosis/manía postparto por primera vez en la vida, según estudios de ingresos psiquiátricos en registros basados en la población, varía entre 0,25 y 0,6 por 1000 nacimientos. Después de un episodio incipiente, entre el 20% y el 50% de las mujeres tienen psicosis postparto aislada. El resto de las mujeres tienen episodios después del período perinatal, normalmente dentro del espectro bipolar. Presuntamente, el mecanismo de inicio está relacionado con cambios psicológicos después del parto (por ejemplo, hormonales, inmunológicos, circadianos) que precipitan la enfermedad en mujeres genéticamente vulne-

rables. Algunas mujeres tienen causas y comorbilidades tratables, como tiroiditis autoinmune o infecciones. Después del parto, con la psicosis puede presentarse encefalitis por N-Metil-D-Aspartato o errores congénitos de metabolismo. Menos de 30 publicaciones se han centrado en el tratamiento de la psicosis postparto. El mayor estudio (N=64) ofreció evidencia que el litio es altamente eficaz para el tratamiento tanto agudo como de mantenimiento. Otro informe (N=34) describió el tratamiento exitoso con TEC. Normalmente se requiere de atención hospitalaria para garantizar la seguridad, completar la evaluación diagnóstica e iniciar el tratamiento. El riesgo de recaída después de un embarazo subsiguiente para mujeres con psicosis postparto aisladas es del 31% (IC 95%=22–42). Las estrategias de prevención de psicosis postparto incluyen profilaxis con litio inmediata en el postparto y monitoreo proactivo de la seguridad.

**Conclusiones:** La psicosis postparto brinda un modelo interesante para explorar los aportes etiológicos a la neurobiología de la psicosis afectiva.

(*Am J Psychiatry* 2016; 173:1179–1188)

# El dolor como predictor del trastorno por consumo de opiáceos en una muestra nacionalmente representativa

Carlos Blanco, M.D., Ph.D., Melanie M. Wall, Ph.D., Mayumi Okuda, M.D., Shuai Wang, Ph.D., Miren Iza, M.D., Mark Olfson, M.D., M.P.H.

**Objetivo:** Los autores se propusieron corroborar la relación entre el dolor moderado y más severo y los trastornos por consumo de opiáceos recetados en la población estadounidense no institucionalizada.

**Método:** Se utilizó un modelo de ecuaciones estructurales para evaluar de manera prospectiva la interdependencia entre el dolor y el trastorno por consumo de opiáceos recetados en las fases 1 (2001–2002) y 2 (2004–2005) de la Encuesta Epidemiológica Nacional de los Estados Unidos sobre enfermedades relacionadas con el alcohol. El dolor se midió con una escala de 5 puntos relacionada con interferencia del dolor en actividades rutinarias y se dicotomizó como «sin dolor» (ninguna o poca interferencia) o «con dolor» (interferencia de moderada a extrema). El trastorno por consumo de opiáceos recetados se evaluó con una entrevista estructurada (versión del DSM-IV del *Alcohol Use Disorder and Associated Disabilities Interview Schedule*). Otras covariables incluyeron edad, sexo, ansiedad o trastornos del ánimo e historial familiar de problemas de drogas, alcohol o comportamentales.

**Resultados:** En el modelo de ecuaciones estructurales, el dolor y los trastornos por consumo de opiáceos estuvieron

mutuamente asociados de forma significativa al inicio del estudio y en el seguimiento a los 3 años. Sin embargo, mientras que el dolor al inicio del estudio también estuvo asociado de manera significativa con el trastorno por consumo de opiáceos recetados en el seguimiento, el trastorno por consumo de opiáceos recetados al inicio del estudio no estuvo asociado con el dolor en el seguimiento. Estas asociaciones fueron independientes de varias características contextuales, tanto demográficas como clínicas. La vía para la interferencia del dolor se asoció con un aumento relativo del 41% del riesgo de desarrollar un trastorno por consumo de opiáceos recetados.

**Conclusiones:** Las enfermedades dolorosas contribuyen al riesgo de trastornos por consumo de opiáceos recetados. Para ayudar a reducir la incidencia del abuso de los opiáceos recetados y la dependencia en los adultos con dolor moderado o severo, es necesario un hacer un monitoreo minucioso y considerar tratamientos alternativos que no incluyan opiáceos.

(*Am J Psychiatry* 2016; 173:1189–1195)

# La mejoría temprana de la productividad laboral predice el curso clínico futuro en pacientes ambulatorios deprimidos: Hallazgos del ensayo CO-MED

Manish K. Jha, M.B.B.S., Abu Minhajuddin, Ph.D., Tracy L. Greer, Ph.D., Thomas Carmody, Ph.D., A. John Rush, M.D., Madhukar H. Trivedi, M.D.

**Objetivo:** La severidad de los síntomas de depresión, el resultado más comúnmente estudiado en los ensayos de tratamientos con antidepresivos, explica solamente una pequeña parte de la carga relacionada con la depresión mayor. Mientras que la pérdida de productividad laboral es el factor que más contribuye a la carga económica de la depresión, pocos estudios han evaluado sistemáticamente el efecto independiente del tratamiento en la productividad laboral y la relación entre los cambios en la productividad laboral y el curso clínico a más largo plazo.

**Método:** La productividad laboral se midió repetidamente con el cuestionario de auto-informe sobre productividad laboral y discapacidad (*Work Productivity and Activity Impairment*) en 331 participantes empleados con depresión mayor, que participaron en el ensayo Combinación de Medicamentos para Mejorar los Resultados de la Depresión (CO-MED, por sus siglas en inglés: *Combining Medications to Enhance Depression Outcomes Enhance Depression Outcomes*). Se identificaron las trayectorias de cambio en productividad laboral durante las primeras 6 semanas de tratamiento y se utilizaron para predecir la remisión a los 3 y a los 7 meses.

**Resultados:** Los participantes reportaron una disminución de las ausencias al trabajo y un aumento de la productividad laboral con el tratamiento con antidepresivos, incluso después de controlar los cambios de la severidad de la depresión. Se identificaron tres trayectorias claras de los cambios en la productividad laboral: 1) una marcada mejora temprana (24%), 2) un cambio mínimo (49%) y 3) una leve disminución de la alta discapacidad (27%). En comparación con los otros participantes, los que tuvieron una mejora marcada tuvieron unas tasas de remisión entre 3 y 5 veces más altas a los 3 meses, y tasas de remisión entre 2 y 5 veces más altas a los 7 meses, incluso después de controlar variables seleccionadas al inicio del estudio y el estatus de remisión a la semana 6.

**Conclusiones:** En este análisis secundario, la productividad laboral auto-reportada mejoró en los pacientes deprimidos con tratamiento con antidepresivos incluso después de explicar la reducción de los síntomas depresivos. La mejoría temprana de la productividad laboral está asociada con tasas de remisión mucho más altas después de 3 y 7 meses de tratamiento.

(*Am J Psychiatry* 2016; 173:1196–1204)

## Eficacia de la monoterapia con quetiapina en el trastorno por estrés postraumático: Un ensayo aleatorizado, controlado con placebo

Gerardo Villarreal, M.D., Mark B. Hamner, M.D., José M. Cañive, M.D., Sophie Robert, Pharm.D., Lawrence A. Calais, R.N., C.C.R.C., Valerie Durklaski, Ph.D., Yusheng Zhai, M.S., M.S.P.H., Clifford Qualls, Ph.D.

**Objetivo:** Este fue un ensayo de 12 semanas, aleatorizado y controlado con placebo, para evaluar la eficacia de la monoterapia con quetiapina en el tratamiento del trastorno por estrés postraumático (TEPT).

**Método:** Ochenta pacientes fueron asignados de manera aleatoria para recibir tratamiento con quetiapina o con placebo. La medida primaria de resultados fue la Escala de TEPT administrada por un clínico (CAPS por sus siglas en inglés). Las medidas secundarias de eficacia incluyeron las subescalas de CAPS, La Escala de Trauma de Davidson, La Escala de los Síndromes Positivo y Negativo (PANSS), las evaluaciones de severidad de la enfermedad y de mejoría de la escala de Impresión Clínica Global (GCI), la Escala de Evaluación de la Depresión de Hamilton (HAM-D) y la Escala de Evaluación de la Ansiedad de Hamilton (HAM-A). Las mediciones de seguridad incluyeron eventos adversos, signos vitales, la Escala de Movimientos Involuntarios Anormales, la Escala de Akatisia de Barnes, la Escala de Simpson-Angus y la Escala de Experiencia Sexual de Arizona.

**Resultados:** Después de un período inicial de 1 semana con

placebo, se inició la quetiapina con una dosis diaria de 25 mg y se aumentó hasta un máximo de 800 mg; el promedio fue de 258mg (rango, 50–800 mg). Las reducciones de las puntuaciones total, de re-experimentación y de hiperactivación de la escala CAPS fueron significativamente mayores para el grupo de quetiapina que para el grupo de placebo. También se observaron mayores mejoras para la quetiapina que para el placebo en las puntuaciones de la Escala de Trauma de Davidson, las evaluaciones de severidad y mejoría de la escala CGI, las subescalas de síntomas positivos y de psicopatología general de PANSS, y las escalas HAM-A y HAM-D. Los eventos adversos fueron generalmente suaves y esperados con base en estudios anteriores de quetiapina en esta y en otras poblaciones de pacientes. No hubo diferencias en las medidas de seguridad entre los grupos.

**Conclusión:** La monoterapia con quetiapina fue eficaz en el tratamiento de TEPT. Estos hallazgos sugieren que la quetiapina como agente único es efectiva para tratar el TEPT militar.

(*Am J Psychiatry* 2016; 173:1205–1212)

# Un estudio de imágenes con tensor de difusión en niños con TDAH, trastorno del espectro autista, TOC, y controles de comparación: Perturbación claramente definida e indefinida de la sustancia blanca y relaciones dimensionales entre cerebro y comportamiento

Stephanie H. Ameis, M.D., M.Sc., Jason P. Lerch, Ph.D., Margot J. Taylor, Ph.D., Wayne Lee, M.Sc., Joseph D. Viviano, M.Sc., Jon Pipitone, M.Sc., Arash Nazeri, M.D., Paul E. Croarkin, D.O., M.Sc., Aristotle N. Voineskos, M.D., Ph.D., Meng-Chuan Lai, M.D., Ph.D., Jennifer Crosbie, Ph.D., Jessica Brian, Ph.D., Noam Soreni, M.D., Russell Schachar, M.D., Peter Szatmari, M.D., Paul D. Arnold, M.D., Ph.D., Evdokia Anagnostou, M.D.

**Objetivo:** Los trastornos del neurodesarrollo (TND) (trastorno por déficit de atención e hiperactividad [TDAH], trastorno del espectro autista [TEA] y trastorno obsesivo-compulsivo [TOC]) comparten dominios de síntomas y vulnerabilidad genética. Los autores presentan una comparación directa de los circuitos cerebrales estructurales en niños y adolescentes con TND y sujetos control y examinan las relaciones entre circuito cerebral y comportamiento en los TND utilizando medidas dimensionales relacionadas entre sí.

**Método:** Se obtuvieron imágenes con difusión y medidas comportamentales de 200 niños y adolescentes (TDAH: N=31; TOC: N=36; TEA: N=71; controles: N=62; rango medio de edad: 10,3–12,6 años). Después de estadística espacial basada en tracto, se llevó a cabo una comparación multigrupal de los índices de sustancia blanca, seguida de comparaciones por pares. Las relaciones de anisotropía fraccional con medidas dimensionales de inatención, déficits sociales, síntomas obsesivo-compulsivos y funcionamiento adaptativo general se llevaron a cabo en la muestra de los TND.

**Resultados:** Se encontró menor anisotropía fraccional en el esplenio del cuerpo calloso en todos los grupos de los TND,

en comparación con el grupo control. Se encontró menor anisotropía fraccional en los tractos de sustancia blanca adicionales en los grupos de TEA y TDAH, en comparación con el grupo control, pero no en el grupo de TOC. La anisotropía fraccional fue inferior en los grupos de TEA y TDAH en comparación con el grupo de TOC, pero no hubo diferencia entre los participantes con TDAH y los participantes con TEA. Se mostró una relación positiva entre la anisotropía fraccional (en la mayor parte del cerebro) y el funcionamiento adaptativo general en los TND.

**Conclusiones:** Este estudio identificó que la perturbación de los circuitos interhemisféricos (es decir, las alteraciones de la anisotropía fraccional en el cuerpo calloso) son una característica compartida entre el TEA, el TDAH y el TOC. Sin embargo, las alteraciones de la anisotropía fraccional pueden ser más comunes y severas en el TEA y el TDAH que en el TOC. Una mayor anisotropía fraccional en todo el cerebro parece estar relacionada con una mejor función adaptativa en todos los TND.

(*Am J Psychiatry* 2016; 173:1213–1222)

## La respuesta neural atenuada a las recompensas como un predictor prospectivo del desarrollo de la depresión en niñas adolescentes

Brady D. Nelson, Ph.D., Greg Perlman, Ph.D., Daniel N. Klein, Ph.D., Roman Kotov, Ph.D., Greg Hajcak, Ph.D.

**Objetivo:** Una respuesta neural atenuada a las recompensas se ha considerado recientemente como un biomarcador "mecánico" potencial de la depresión adolescente. La positividad de las recompensas, un potencial relacionado con los eventos provocado por la retroalimentación que indica una ganancia monetaria en relación a una pérdida, se ha asociado con el riesgo de depresión. Los autores examinaron si la positividad de las recompensas predecía prospectivamente el desarrollo de la depresión 18 meses más tarde en una muestra grande de una comunidad de niñas adolescentes.

**Método:** La muestra incluía 444 niñas, de entre 13,5 y 15,5 años sin historial de trastorno depresivo, y uno de los padres biológicos de cada niña. Al inicio del estudio, la positividad de las recompensas de las adolescentes se midió utilizando una tarea de adivinanza monetaria, sus síntomas depresivos actuales se evaluaron utilizando un cuestionario de auto-reporte, y los historiales psiquiátricos de toda la vida de las adolescentes y de sus padres se evaluaron con entrevistas diagnósticas. La misma entrevista y el mismo cuestionario se administraron a las adolescentes nuevamente aproximadamente 18 meses más tarde.

**Resultados:** Una positividad atenuada de las recompensas al inicio predijo el inicio por primera vez del trastorno depresivo y una mayor puntuación de síntomas depresivos a los 18 meses. La positividad de las recompensas también fue un predictor significativo independiente de otros factores de riesgo prominentes, incluyendo los síntomas depresivos al inicio del estudio y el historial médico de la vida de las adolescentes y sus padres. La combinación de una positividad atenuada de las recompensas y puntuaciones más altas de los síntomas depresivos al inicio del estudio ofrecieron el mayor valor predictivo positivo del inicio por primera vez del trastorno depresivo.

**Conclusiones:** Este estudio ofrece evidencia convergente sólida de que una respuesta neural atenuada a las recompensas precede el inicio en la adolescencia de la depresión y del surgimiento de los síntomas. La respuesta neural atenuada puede por lo tanto constituir un objetivo importante para el escaneo y la prevención.

*(Am J Psychiatry 2016; 173:1223–1230)*



## Un estudio longitudinal del trastorno de adaptación después de la exposición al trauma

Meaghan L. O'Donnell, Ph.D., Nathan Alkemade, Ph.D., Mark Creamer, Ph.D., Alexander C. McFarlane, M.D., F.R.A.N.Z.C.P., Derrick Silove, M.D., F.R.A.N.Z.C.P., Richard A. Bryant, Ph.D., Kim Felmingham, Ph.D., Zachery Steel, Ph.D., David Forbes, Ph.D.

**Objetivo:** El trastorno de adaptación se ha caracterizado como un trastorno relacionado con el trauma y los factores estresantes en el DSM-5. El objetivo de este estudio fue determinar la prevalencia del trastorno de adaptación en los primeros 12 meses después de una lesión grave; determinar si el trastorno de adaptación era un trastorno menos severo en comparación con otros trastornos en términos de discapacidad y calidad de vida; investigar la trayectoria del trastorno de adaptación; y examinar si los subtipos descritos en el DSM-5 son diferenciables.

**Método:** En un estudio multicéntrico de cohorte, pacientes lesionados fueron evaluados durante su hospitalización y a los 3 y 12 meses después de la lesión (N=826). Se utilizaron entrevistas clínicas estructuradas para evaluar los trastornos afectivos, de ansiedad y de abuso de sustancias, y se administraron medidas de auto-reporte para la incapacidad, ansiedad, depresión y calidad de vida.

**Resultados:** La prevalencia del trastorno de adaptación fue

19% a los 3 meses y 16% a los 12 meses. Los participantes con trastorno de adaptación reportaron peores resultados en relación a los que no tenían diagnósticos psiquiátricos, pero mejores resultados en comparación con los que tenían otros diagnósticos psiquiátricos. Los participantes con trastorno de adaptación a los 3 meses después de la lesión tuvieron mayor probabilidad de cumplir con los criterios de un trastorno psiquiátrico a los 12 meses (*odds ratio*=2,67; IC 95%=1,5924,49) Un análisis de perfil latente identificó un modelo de 3 clases que estaba basado en la severidad de los síntomas, no los subtipos identificados por el DSM-5.

**Conclusiones:** Este estudio apoya la recategorización del trastorno de adaptación en los trastornos relacionados con el trauma y los factores estresantes. Sin embargo, es necesario una descripción más detallada de la fenomenología del trastorno.

(*Am J Psychiatry* 2016; 173:1231–1238)
